# Supplementary material for: Pre-analytical stability of the plasma proteomes based on the storage temperature
Source: PubMed Central journal article supplement (PMC3658880; doi:10.1186/1477-5956-11-10), 2013-03-21
Supplement: 1477-5956-11-10-S1.pdf [file 1477-5956-11-10-S1.pdf]

## Supplementary Table S1

## The matched peptides sequences of each protein spots identified through MALDI-TOF MS

| Spot <sup>a</sup> | Identified protein        | Acc. no. <sup>b</sup> | Sequence <sup>c</sup>                                                                                                                                                                                                                                                                                                                                                                                                                                                                                                                    |
|-------------------|---------------------------|-----------------------|------------------------------------------------------------------------------------------------------------------------------------------------------------------------------------------------------------------------------------------------------------------------------------------------------------------------------------------------------------------------------------------------------------------------------------------------------------------------------------------------------------------------------------------|
| 1                 | Vitamin D-binding protein | P02774                | K.EFSHLGKEDFTSLSLVLYSR.K<br>R.KFPSGTFEQVSQLVK.E<br>K.EVVSLEACCAEGADPDCYDTR.T<br>K.SCESNSPPVHPGTAECCTKEGLER.K<br>K.HQPQEFPTYVEPTNDEICEAFR.K<br>K.SYLSMVGSCCTSASPTVCFLK.E Oxidation (M)<br>K.HLSLLTTLNLR.V<br>K.VMDKYTFELSR.R Oxidation (M)<br>R.RTHLPEVFLSK.V<br>K.SLGECCDVEDSTTCFNAK.G<br>R.SDFASNCCSINSPPLYCDSEIDAELKNIL.-                                                                                                                                                                                                              |
| 2                 | Serum albumin             | P02768                | R.DAHKSEVAHR.F<br>R.FKDLGEENFK.A<br>R.LVRPEVDVMCTAFHDNEETFLKK.Y + Oxidation (M)<br>K.YLYEIAR.R<br>R.AFKAWAVAR.L<br>K.VHTECCHGDLLECADDRADLAK.Y<br>R.RHPDYSVLLLLR.L<br>K.VFDEFKPLVEEPQNLK.Q<br>K.QNCELFEQLGEYKFQNALLR.Y<br>K.FQNALLR.Y<br>K.RMPCAEDYLSVVLNQLCVLHEK.T + Oxidation (M)<br>K.EFNAETTFHADICTLSEKER.Q                                                                                                                                                                                                                           |
| 3                 | Serum albumin             | P02768                | R.FKDLGEENFK.A<br>K.LVNEVTEFAK.T<br>R.LVRPEVDVMCTAFHDNEETFLKK.Y Oxidation (M)<br>K.YLYEIAR.R<br>R.HPYFYAPELFFAKR.Y<br>K.AAFTECCQAADKAACLLPK.L<br>R.AFKAWAVAR.L<br>K.LVTDLTKVHTECCHGDLLECADDR.A<br>K.YICENQDSISSKLE.E<br>K.LKECCEKPLEK.S<br>K.SHCIAEVENDEMPADLPSLAADFVESK.D Oxidation (M)<br>K.SHCIAEVENDEMPADLPSLAADFVESKDVCK.N Oxidation (M)<br>R.RHPDYSVLLLLR.L<br>K.QNCELFEQLGEYKFQNALLR.Y Gln->pyro-Glu (N-term Q)<br>K.QNCELFEQLGEYKFQNALLR.Y<br>R.RPCFSALEVDETYVPK.E<br>K.EFNAETTFHADICTLSEKER.Q<br>K.AVMDDFAAFVEK.C Oxidation (M) |

| Spot <sup>a</sup> | Identified protein  | Acc. no. <sup>b</sup> | Sequence <sup>c</sup>                                                                                                                                                                                                                                                                                                                                                                                                                                                                                                                        |
|-------------------|---------------------|-----------------------|----------------------------------------------------------------------------------------------------------------------------------------------------------------------------------------------------------------------------------------------------------------------------------------------------------------------------------------------------------------------------------------------------------------------------------------------------------------------------------------------------------------------------------------------|
| 4                 | Serum albumin       | P02768                | R.FKDLGEENFK.A<br>K.LVNEVTEFAK.T<br>R.HPYFYAPELLFFAKR.Y<br>R.YKAAFTECCQAADK.A<br>K.AAFTECCQAADKAACLLPK.L<br>K.VHTECCHGDLLECADDR.A<br>K.VHTECCHGDLLECADDRADLAK.Y<br>K.LKECCEKPLEK.S<br>K.SHCIAEVENDEMPADLPSLAADFVESK.D + Oxidation (M)<br>K.DVFLGMFLYEYAR.R<br>R.RHPDYSVLLLR.L<br>K.TYETTLEKCCAAADPHECYAK.V<br>K.CCAAADPHECYAK.V<br>K.VFDEFKPLVEEPQNLK.Q<br>K.QNCELFEQLGEYKFNALLVR.Y<br>K.KVPQVSTPTLVEVSR.N<br>K.VPQVSTPTLVEVSR.N<br>R.RPCFSALEVDETYVPK.E<br>K.EFNAETTFHADICTLSEKER.Q<br>K.AVMDDFAAFVEK.C<br>K.AVMDDFAAFVEK.C + Oxidation (M) |
| 5                 | Alpha-1-antitrypsin | P01009                | K.ITPNLAEFASLYR.Q<br>R.TLNQPDSQLQLTTGNGLFLSEGLK.L<br>K.LYHSEFTVNFGDTEEAK.K<br>K.LYHSEFTVNFGDTEEAKK.Q<br>K.RLGMFNIQHCK.K Oxidation (M)<br>R.LGMFNIQHCK.K Oxidation (M)<br>R.LGMFNIQHCKK.L Oxidation (M)<br>K.FLENEDRR.S<br>K.VFSNGADLSGVTEEAPLK.L<br>K.VFSNGADLSGVTEEAPLKLSK.A<br>K.AVLTIDEKGTEAAGAMFLEAIPMSIPPEVK.F 2 Oxidation (M)<br>K.GTEAAGAMFLEAIPMSIPPEVK.F 2 Oxidation (M)<br>K.FNKPFVFLMIEQNTK.S Oxidation (M)                                                                                                                       |
| 6                 | Alpha-1-antitrypsin | P01009                | K.ITPNLAEFASLYR.Q<br>K.LYHSEFTVNFGDTEEAKK.Q<br>K.DTEEDFHVDQVTTVK.V<br>K.RLGMFNIQHCK.K Oxidation (M)<br>R.LGMFNIQHCK.K Oxidation (M)<br>K.FLENEDRR.S<br>K.VFSNGADLSGVTEEAPLKLSK.A<br>K.AVLTIDEKGTEAAGAMFLEAIPMSIPPEVK.F 2 Oxidation (M)<br>K.GTEAAGAMFLEAIPMSIPPEVK.F 2 Oxidation (M)<br>K.FNKPFVFLMIEQNTK.S Oxidation (M)                                                                                                                                                                                                                    |

| Spot <sup>a</sup> | Identified protein     | Acc. no. <sup>b</sup> | Sequence <sup>c</sup>                                                                                                                                                                                                                                                                                                                                                                                    |
|-------------------|------------------------|-----------------------|----------------------------------------------------------------------------------------------------------------------------------------------------------------------------------------------------------------------------------------------------------------------------------------------------------------------------------------------------------------------------------------------------------|
| 7                 | Fibrinogen beta chain  | P02675                | K.HQLYIDETVNSNIPTNLR.V<br>R.TPCTVSCNIPVVSGKECEIIR.K<br>R.KGGETSEMYLIQPDSVVKPYR.V + Oxidation (M)<br>K.GGETSEMYLIQPDSVVKPYR.V<br>K.AHYGGFTVQNEANKYQISVVK.Y<br>R.YYWGGQYTWDMAK.H + Oxidation (M)<br>K.IRPFPPQQ.-                                                                                                                                                                                           |
| 8                 | Fibrinogen beta chain  | P02675                | K.REEAPSLRPAPPPISGGGYR.A<br>R.EEAPSLRPAPPPISGGGYR.A<br>R.NSVDELNNNVEAVSQTSSTSSSFQYMYLLK.D Oxidation (M)<br>K.QVKDNENVVNEYSSELEK.H<br>K.DNENVVNEYSSELEKHQLYIDETVNSNIPTNLR.V<br>R.KGGETSEMYLIQPDSVVKPYR.V<br>K.GGETSEMYLIQPDSVVKPYR.V<br>K.GGETSEMYLIQPDSVVKPYR.V Oxidation (M)<br>K.AHYGGFTVQNEANKYQISVVK.Y<br>K.IRPFPPQQ.-                                                                               |
| 9                 | Fibrinogen gamma chain | P02679                | R.DNCCILDER.F<br>R.FGSYCPTTCGIADFLSTYQTK.V<br>K.AIQLTYNPDESSKPNMIDAATLK.S Oxidation (M)<br>R.YLQEIYNSNNQK.I<br>K.VAQLEAQCQEPCKDTVQIHDITGK.D<br>K.QSGLYFIKPLK.A Gln->pyro-Glu (N-term Q)<br>K.QSGLYFIKPLK.A<br>K.ANQQFLVYCEIDGSGNGWTVFQK.R<br>K.ANQQFLVYCEIDGSGNGWTVFQKR.L<br>K.EFGHLSPTGTTEFWLGNEK.I<br>K.IHLISTQSAIPYALR.V<br>K.ASTPNGYDNGIIVATWK.T<br>K.IIPFNRLTIGEGQQHHLGGAK.Q<br>R.LTIGEGQQHHLGGAK.Q |
| 10                | Fibrinogen gamma chain | P02679                | R.FGSYCPTTCGIADFLSTYQTK.V<br>K.AIQLTYNPDESSKPNMIDAATLK.S Oxidation (M)<br>R.YLQEIYNSNNQK.I<br>K.VAQLEAQCQEPCKDTVQIHDITGK.D<br>K.QSGLYFIKPLK.A Gln->pyro-Glu (N-term Q)<br>K.QSGLYFIKPLK.A<br>K.ANQQFLVYCEIDGSGNGWTVFQK.R<br>K.ANQQFLVYCEIDGSGNGWTVFQKR.L<br>K.EFGHLSPTGTTEFWLGNEK.I<br>K.IHLISTQSAIPYALR.V<br>K.CHAGHLNGVYVYQGGTYSK.A                                                                    |

| Spot <sup>a</sup> | Identified protein     | Acc. no. <sup>b</sup> | Sequence <sup>c</sup>                                                                                                                                                                                                                                                                                                                                                                                     |
|-------------------|------------------------|-----------------------|-----------------------------------------------------------------------------------------------------------------------------------------------------------------------------------------------------------------------------------------------------------------------------------------------------------------------------------------------------------------------------------------------------------|
|                   |                        |                       | K.ASTPNGYDNGI IWATWK.T<br>K.IIPFNRLTIGEGQQHHLGGAK.Q<br>R.LTIGEGQQHHLGGAK.Q                                                                                                                                                                                                                                                                                                                                |
|                   |                        |                       | R.DNCCILDER.F<br>R.FGSYCPTTCGIADFLSTYQTK.V<br>R.YLQEIYNSNNQK.I<br>K.VAQLEAQCQEPCKDTVQIHDITGK.D<br>K.QSGLYFIKPLK.A Gln->pyro-Glu (N-term Q)<br>K.QSGLYFIKPLK.A<br>K.ANQQFLVYCEIDGSGNGWTVFQK.R<br>K.ANQQFLVYCEIDGSGNGWTVFQKR.L<br>K.NWIQYKEGFGHLSPTGTTEFWLGNEK.I<br>K.EFGHLSPTGTTEFWLGNEK.I<br>K.IHLISTQSAIPYALR.V<br>K.ASTPNGYDNGI IWATWK.T<br>K.IIPFNRLTIGEGQQHHLGGAK.Q<br>R.LTIGEGQQHHLGGAK.Q            |
| 11                | Fibrinogen gamma chain | P02679                | K.ANQQFLVYCEIDGSGNGWTVFQK.R<br>K.ANQQFLVYCEIDGSGNGWTVFQKR.L<br>K.NWIQYKEGFGHLSPTGTTEFWLGNEK.I<br>K.EFGHLSPTGTTEFWLGNEK.I<br>K.IHLISTQSAIPYALR.V<br>K.ASTPNGYDNGI IWATWK.T<br>K.IIPFNRLTIGEGQQHHLGGAK.Q<br>R.LTIGEGQQHHLGGAK.Q                                                                                                                                                                             |
|                   |                        |                       | R.DNCCILDER.F<br>R.FGSYCPTTCGIADFLSTYQTK.V<br>K.AIQLTYNPDESSKPNMIDAATLK.S Oxidation (M)<br>R.YLQEIYNSNNQK.I<br>K.VAQLEAQCQEPCKDTVQIHDITGK.D<br>K.QSGLYFIKPLK.A Gln->pyro-Glu (N-term Q)<br>K.QSGLYFIKPLK.A<br>K.ANQQFLVYCEIDGSGNGWTVFQK.R<br>K.ANQQFLVYCEIDGSGNGWTVFQKR.L<br>K.EFGHLSPTGTTEFWLGNEK.I<br>K.IHLISTQSAIPYALR.V<br>K.ASTPNGYDNGI IWATWK.T<br>K.IIPFNRLTIGEGQQHHLGGAK.Q<br>R.LTIGEGQQHHLGGAK.Q |
| 12                | Fibrinogen gamma chain | P02679                | K.ANQQFLVYCEIDGSGNGWTVFQK.R<br>K.ANQQFLVYCEIDGSGNGWTVFQKR.L<br>K.EFGHLSPTGTTEFWLGNEK.I<br>K.IHLISTQSAIPYALR.V<br>K.ASTPNGYDNGI IWATWK.T<br>K.IIPFNRLTIGEGQQHHLGGAK.Q<br>R.LTIGEGQQHHLGGAK.Q                                                                                                                                                                                                               |

| Spot <sup>a</sup>   | Identified protein | Acc. no. <sup>b</sup> | Sequence <sup>c</sup>              |
|---------------------|--------------------|-----------------------|------------------------------------|
| 13                  | Serotransferrin    | P02787                | R.WCAVSEHEATK.C                    |
|                     |                    |                       | R.WCAVSEHEATKCQSFR.D               |
|                     |                    |                       | K.CQSFRDHMK.S Oxidation (M)        |
|                     |                    |                       | K.SVIPSDGPSVACVK.K                 |
|                     |                    |                       | K.KASYLDCIR.A                      |
|                     |                    |                       | K.ASYLDCIR.A                       |
|                     |                    |                       | K.KDSGFQMNQLR.G                    |
|                     |                    |                       | K.KDSGFQMNQLR.G Oxidation (M)      |
|                     |                    |                       | K.DSGFQMNQLR.G Oxidation (M)       |
|                     |                    |                       | R.SAGWNIPIGLLYCDLPEPR.K            |
|                     |                    |                       | K.HSTIFENLANKADR.D                 |
|                     |                    |                       | K.ADRDQYELLCLDNTR.K                |
|                     |                    |                       | R.KPVDEYKDCHLAQVPSHTVVAR.S         |
|                     |                    |                       | K.DLLFKDSAHGFLK.V                  |
|                     |                    |                       | R.MDAKMYLGYEYVTAIR.N Oxidation (M) |
|                     |                    |                       | K.MYLGYEYVTAIR.N                   |
|                     |                    |                       | R.NLREGTCPEAPTDECKPVK.W            |
|                     |                    |                       | K.WCALSHHER.L                      |
|                     |                    |                       | K.SASDLTWDNLKGGK.K                 |
|                     |                    |                       | K.INHCRFDEFFSEGCAPGSK.K            |
|                     |                    |                       | K.CDEWSVNSVGKIECVSAETTEDCIAK.I     |
|                     |                    |                       | K.SASDLTWDNLK.G                    |
|                     |                    |                       | R.FDEFFSEGCAPGSKK.D                |
|                     |                    |                       | K.LCMGSGLNLCENPNK.E Oxidation (M)  |
|                     |                    |                       | K.LCMGSGLNLCENPNKEGYGYTGAFR.C      |
|                     |                    |                       | K.EGYGYTGAFR.C                     |
|                     |                    |                       | K.EGYGYTGAFRCLVEK.G                |
|                     |                    |                       | R.CLVEKGDVAFVK.H                   |
|                     |                    |                       | K.HQTVPQNTGGK.N                    |
|                     |                    |                       | K.HQTVPQNTGGKNPDPWAK.N             |
|                     |                    |                       | K.NLNEKDYELLCLDGTR.K               |
|                     |                    |                       | R.KPVVEYANCHLAR.A                  |
|                     |                    |                       | R.APNHAVVTR.K                      |
| K.DLLFRDDTVCLAK.L   |                    |                       |                                    |
| K.LHDRNTYEK.Y       |                    |                       |                                    |
| R.NTYEKYLGEYVK.A    |                    |                       |                                    |
| K.YLGEYVK.A         |                    |                       |                                    |
| R.KCSTSSLLEACTFR.R  |                    |                       |                                    |
| K.CSTSSLLEACTFR.R   |                    |                       |                                    |
| K.CSTSSLLEACTFRFP.- |                    |                       |                                    |

| Spot <sup>a</sup> | Identified protein | Acc. no. <sup>b</sup> | Sequence <sup>c</sup>                                                                                                                                                                                                                                                                                                                                                                                                                                                                                               |
|-------------------|--------------------|-----------------------|---------------------------------------------------------------------------------------------------------------------------------------------------------------------------------------------------------------------------------------------------------------------------------------------------------------------------------------------------------------------------------------------------------------------------------------------------------------------------------------------------------------------|
| 14                | Serotransferrin    | P02787                | K.DSGFQMNQLR.G<br>R.SAGWNIPIGLLYCDLPEPR.K<br>R.KPVDEYKDCHLAQVPSHTVVAR.S<br>R.MDAKMYLGYEYVTAIR.N + Oxidation (M)<br>K.MYLGYEYVTAIR.N<br>K.MYLGYEYVTAIR.N + Oxidation (M)<br>K.INHCRFDEFFSEGCAPGSK.K<br>K.LCMGSGLNLCPEPNNKEGYGYTGAFR.C + Oxidation (M)<br>K.NLNEKDYELLCLDGTR.K<br>R.KPVEEYANCHLAR.A                                                                                                                                                                                                                   |
| 15                | Serotransferrin    | P02787                | K.KASYLDCIR.A<br>R.SAGWNIPIGLLYCDLPEPR.K<br>K.ADRDQYELLCLDNTR.K<br>R.KPVDEYKDCHLAQVPSHTVVAR.S<br>R.MDAKMYLGYEYVTAIR.N + Oxidation (M)<br>K.MYLGYEYVTAIR.N<br>K.MYLGYEYVTAIR.N + Oxidation (M)<br>R.NLREGTCPEAPTDECKPVK.W<br>R.EGTCPEAPTDECKPVKWCALSHHER.L<br>K.WCALSHHER.L<br>K.CDEWSVNSVGKIECVSAETTEDCIAK.I<br>K.INHCRFDEFFSEGCAPGSK.K<br>R.FDEFFSEGCAPGSK.K<br>K.EGYGYTGAFR.C<br>K.NLNEKDYELLCLDGTR.K<br>R.KPVEEYANCHLAR.A<br>K.DLLFRDDTVCLAK.L<br>R.KCSTSSLLEACTFR.R<br>K.CSTSSLLEACTFR.R<br>K.CSTSSLLEACTFRFP.- |
| 16                | Apolipoprotein A-I | P02647                | K.DSGRDYVSQFEFGSALGK.Q<br>K.VQPYLDDFQK.K<br>K.VQPYLDDFQKK.W<br>K.WQEEMELYR.Q Oxidation (M)<br>K.VEPLRAELQEGAR.Q<br>R.THLAPYSDELQR.L<br>K.VSFLSALEEYTK.K                                                                                                                                                                                                                                                                                                                                                             |

| Spot <sup>a</sup> | Identified protein | Acc. no. <sup>b</sup> | Sequence <sup>c</sup>                                                                                                                                                                                                                                                                                                                                                                               |
|-------------------|--------------------|-----------------------|-----------------------------------------------------------------------------------------------------------------------------------------------------------------------------------------------------------------------------------------------------------------------------------------------------------------------------------------------------------------------------------------------------|
| 17                | Apolipoprotein-E   | P02649                | R.QQTEWQSGQR.W<br>R.QQTEWQSGQRWELALGR.F<br>R.FWDYLR.W<br>R.WVQTLSEQVQEELLSSQVTQELR.A<br>R.ALMDETMKELK.A<br>K.AYKSELEEQLTPVAEETR.A<br>R.LSKELQAAQAR.L<br>R.GEVQAMLGQSTEELRVR.L Oxidation (M)<br>R.LASHLRK.L<br>R.LAVYQAGAR.E<br>R.LGPLVEQGR.V<br>R.AATVGSLAGQPLQER.A<br>R.AKLEEQAQQIR.L<br>R.LQAEAFQAR.L<br>R.LKSWFEPLVEDMQR.Q<br>R.LKSWFEPLVEDMQR.Q Oxidation (M)<br>K.SWFEPLVEDMQR.Q Oxidation (M) |
| 18                | Haptoglobin        | P00738                | K.QWINKAVGDK.L<br>R.VMPICLPSKDYAEVGR.V<br>R.VMPICLPSKDYAEVGR.V + Oxidation (M)<br>K.FTDHLKYVMLPVADQDQCIR.H<br>K.YVMLPVADQDQCIR.H<br>K.YVMLPVADQDQCIR.H + Oxidation (M)<br>K.SPVGVQPILNEHTFCAGMSK.Y<br>K.SPVGVQPILNEHTFCAGMSK.Y + Oxidation (M)<br>K.SCAVAEYGVYVK.V                                                                                                                                  |
| 19                | Haptoglobin        | P00738                | K.QWINKAVGDK.L<br>K.DIAPTLTLYVGKK.Q<br>R.VMPICLPSKDYAEVGR.V<br>R.VMPICLPSKDYAEVGR.V Oxidation (M)<br>R.VGYVSGWGR.N<br>R.NANFKFTDHLK.Y<br>K.YVMLPVADQDQCIR.H Oxidation (M)<br>K.SPVGVQPILNEHTFCAGMSK.Y<br>K.SPVGVQPILNEHTFCAGMSK.Y Oxidation (M)<br>K.SCAVAEYGVYVK.V                                                                                                                                 |

---

| Spot <sup>a</sup> | Identified protein  | Acc. no. <sup>b</sup> | Sequence <sup>c</sup>                                                                                    |
|-------------------|---------------------|-----------------------|----------------------------------------------------------------------------------------------------------|
| 20                | Complement factor B | P00751                | R.WSGQTAICDNGAGYCSNPGIPIGTR.K<br>K.EAGIPEFYDYDVALIK.L<br>K.YGQTIRPICLPCTEGTTR.A<br>R.FLCTGGVSPYADPNTCR.G |

---

<sup>a</sup> Spot ID represents the protein spot number on the 2-DE gel image.

<sup>b</sup> Accession numbers of matched proteins according to the SwissProt database.

<sup>c</sup> The sequence of matched peptides.
