# Supplementary material for: Pre-analytical stability of the plasma proteomes based on the storage temperature
Source: PubMed Central journal article supplement (PMC3658880; doi:10.1186/1477-5956-11-10), 2013-03-21
Supplement: 1477-5956-11-10-S2.pdf [file 1477-5956-11-10-S2.pdf]

## Supplementary Table S2

## The matched peptides sequences of each protein spots identified through LC- MS/MS

| Spot <sup>a</sup> | Identified protein        | Acc. no. <sup>b</sup> | Sequence <sup>c</sup>                                                                                                                                                                                                                                                                                                                                                                                                                                                                                                                                                                                                                                  |
|-------------------|---------------------------|-----------------------|--------------------------------------------------------------------------------------------------------------------------------------------------------------------------------------------------------------------------------------------------------------------------------------------------------------------------------------------------------------------------------------------------------------------------------------------------------------------------------------------------------------------------------------------------------------------------------------------------------------------------------------------------------|
| 1                 | Vitamin D-binding protein | P02774                | R.LSNLIK.L<br>K.VLEPTLK.S<br>K.LCDNLSTK.N<br>R.THLPEVFLSK.V<br>R.THLPEVFLSK.V<br>K.LPDATPKELAK.L<br>R.VCSQYAAYGEK.K<br>R.RTHLPEVFLSK.V<br>K.VMDKYTFELSR.R + Oxidation (M)<br>K.VMDKYTFELSR.R + Oxidation (M)<br>K.VMDKYTFELSR.R + Oxidation (M)<br>K.NSKFEDCCQEK.T<br>K.SLGECCDVEDSTTCFNAK.G<br>K.SLGECCDVEDSTTCFNAK.G<br>K.SLGECCDVEDSTTCFNAK.G<br>K.SLGECCDVEDSTTCFNAK.G<br>K.SYLSMVGSCCTSASPTVCFLK.E + Oxidation (M)<br>K.EVVSLTEACCAEGADPDCYDTR.T<br>K.EVVSLTEACCAEGADPDCYDTR.T<br>K.HQPQEFPTYVEPTNDEICEAFR.K<br>K.LAQKVPTADLEDVPLAEDITNILSK.C<br>K.VLEPTLKSLECCDVEDSTTCFNAK.G<br>R.SDFASNCCSINSPPLYCDSEIDAELK.N<br>R.SDFASNCCSINSPPLYCDSEIDAELK.N |
| 13                | Serotransferrin           | P02787                | R.APNHAVVTR.K<br>R.APNHAVVTR.K<br>K.ASYLDCIR.A<br>K.ASYLDCIR.A<br>R.APNHAVVTRK.D<br>K.KASYLDCIR.A<br>K.KASYLDCIR.A<br>K.KASYLDCIR.A<br>K.DSGFQMNQLR.G<br>K.DSGFQMNQLR.G<br>K.DSGFQMNQLR.G + Oxidation (M)<br>K.EGYGYTGAFR.C<br>R.WCAVSEHEATK.C<br>R.WCAVSEHEATK.C<br>K.KDSGFQMNQLR.G<br>R.CLVEKGDVAFVK.H<br>R.CLVEKGDVAFVK.H<br>K.CLKDGAGDVAFVK.H<br>K.CLKDGAGDVAFVK.H<br>K.SVIPSDBGPSVACVK.K<br>K.SVIPSDBGPSVACVK.K<br>K.SASDLTWDNLKKGK.K<br>K.SASDLTWDNLKKGK.K<br>K.MYLGYEYVTAIR.N<br>K.MYLGYEYVTAIR.N<br>K.MYLGYEYVTAIR.N + Oxidation (M)                                                                                                           |

| Spot <sup>a</sup> | Identified protein | Acc. no. <sup>b</sup> | Sequence <sup>c</sup>                                                                                                                                                                                                                                                                                                                                                                                                                                                                                                                                    |
|-------------------|--------------------|-----------------------|----------------------------------------------------------------------------------------------------------------------------------------------------------------------------------------------------------------------------------------------------------------------------------------------------------------------------------------------------------------------------------------------------------------------------------------------------------------------------------------------------------------------------------------------------------|
|                   |                    |                       | K.MYLGYEYVTAIR.N + Oxidation (M)<br>K.CSTSSLLEACTFR.R<br>K.SVIPSDGSPVACVKK.A<br>K.SVIPSDGSPVACVKK.A<br>K.SVIPSDGSPVACVKK.A<br>K.DLLFRDDTVCLAK.L<br>R.FDEFFSEGAPGSK.K<br>R.KPVEEYANCHLAR.A<br>K.YLGEEYKAVGNLR.K<br>K.CSTSSLLEACTFRRP.-<br>K.CSTSSLLEACTFRRP.-<br>K.CSTSSLLEACTFRRP.-<br>R.MDAKMYLGYEYVTAIR.N + Oxidation (M)<br>K.NLNEKDYELLCLDGTR.K<br>K.IMNGEADAMSLDGGFVYIAGK.C + 2 Oxidation (M)<br>R.NLREGTCPEAPTDECKPVK.W<br>R.KPVDEYKDCHLAQVPSHTVVAR.S<br>K.LCMGSLNLCEPNNKEGYYGYTGAFR.C + Oxidation (M)<br>K.IECVSAETTEDCIAKIMNGEADAMSLDGGFVYIAGK.C |
| 17                | Apolipoprotein E   | P02649                | R.GLSAIRER.L<br>R.LAVYQAGAR.E<br>R.LGPLVEQGR.V<br>R.LQAEAFQAR.L<br>R.LSKELQAAQAR.L<br>R.LSKELQAAQAR.L<br>R.LGADMEDVCGR.L<br>R.LGPLVEQGRV.R<br>R.LGADMEDVCGR.L + Oxidation (M)<br>R.ALMDETMKELK.A + 2 Oxidation (M)<br>R.LAVYQAGAREGAER.G<br>R.AATVGS LAGQPLQER.A<br>R.AATVGS LAGQPLQER.A<br>K.VQAAVGTSAAPVPSDNH.-<br>K.AYKSELEEQLTPVAEETR.A                                                                                                                                                                                                              |

<sup>a</sup> Spot ID represents the protein spot number on the 2-DE gel image.

<sup>b</sup> Accession numbers of matched proteins according to the SwissProt database.

<sup>c</sup> The sequence of matched peptides.
